# Supplementary material
Source: PubMed Central journal article supplement (PMC4048634)

**Video S1: PP2 slows and prevents the stimulation of ISO on the sinus node beating rate.**

The video consists of four 10-sec clips. The first is the basal beating, the second during PP2 (10 $\mu$ mol/L), the third during ISO (0.1 $\mu$ mol/L) after washout PP2, and the fourth during ISO in the presence of PP2.

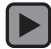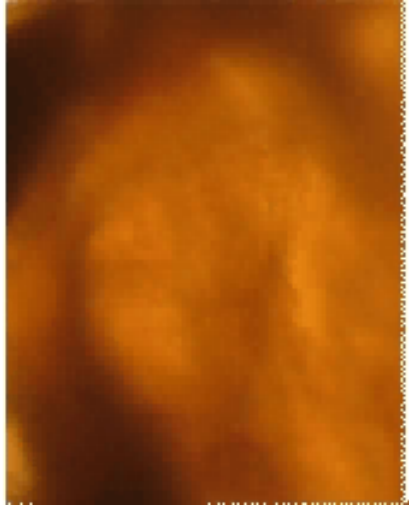

Supplement: NIHMS558624-supplement-2.pdf [file NIHMS558624-supplement-2.pdf]
